# Supplementary material for: Yuanhuacine Is a Potent and Selective Inhibitor of the Basal-Like 2 Subtype of Triple Negative Breast Cancer with Immunogenic Potential
Source: MDPI journal article supplement (doi:10.3390/cancers13112834), 2021-06-07
Supplement: s1 [file s1]

# Supplementary Materials: Yuanhuacine Is a Potent and Selective Inhibitor of the Basal-Like 2 Subtype of Triple Negative Breast Cancer with Immunogenic Potential

Charles S. Fermain<sup>†</sup>, Thilini Peramuna, Shengxin Cai, Leila Takahashi-Ruiz, Jacob Nathaniel Essif, Corena V. Grant, Barry R. O’Keefe, Susan L. Mooberry, Robert H. Cichewicz and April L. Risinger

**A**

## Cytotoxicity assay

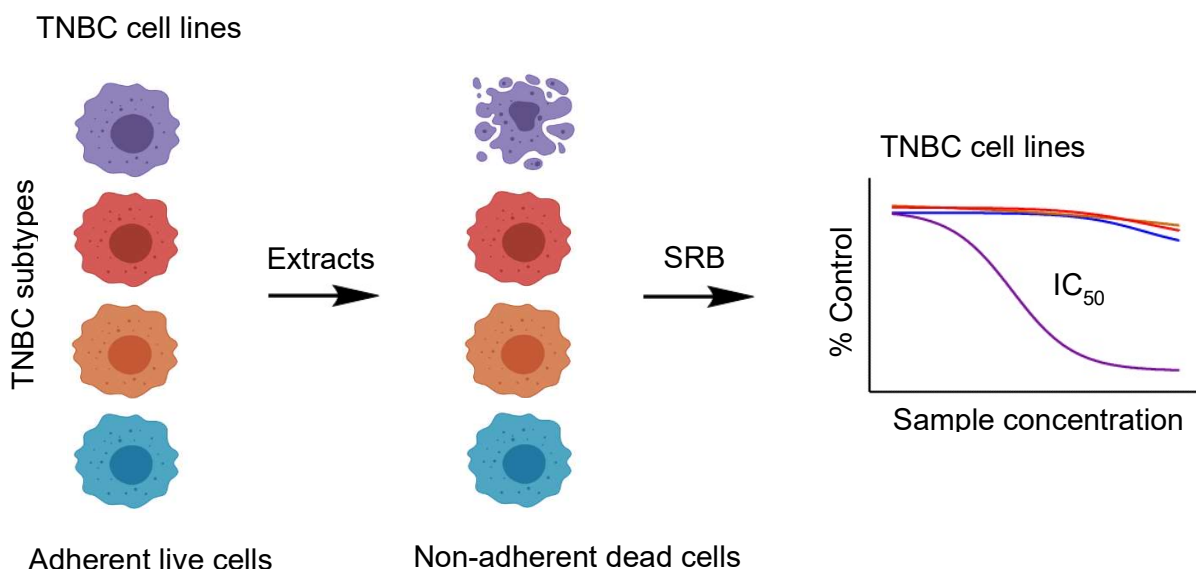

**B**

## Differentiation assay

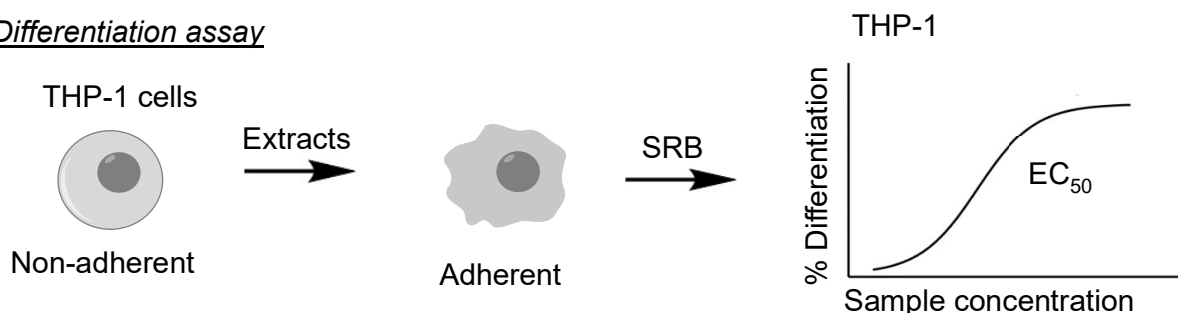

**Figure S1.** TNBC selectivity and THP-1 differentiation screening assays. (A) Schematic diagram illustrating the sulforhodamine B (SRB) based cytotoxicity screening assay against cell lines representing molecularly distinct TNBC subtypes. (B) Schematic diagram illustrating the sulforhodamine B (SRB) based THP-1 differentiation screening assay where non-adherent THP-1 cells in the monocytic state become adherent myeloid cells (e.g. macrophages and dendritic cells) in response to immunogenic ligands.

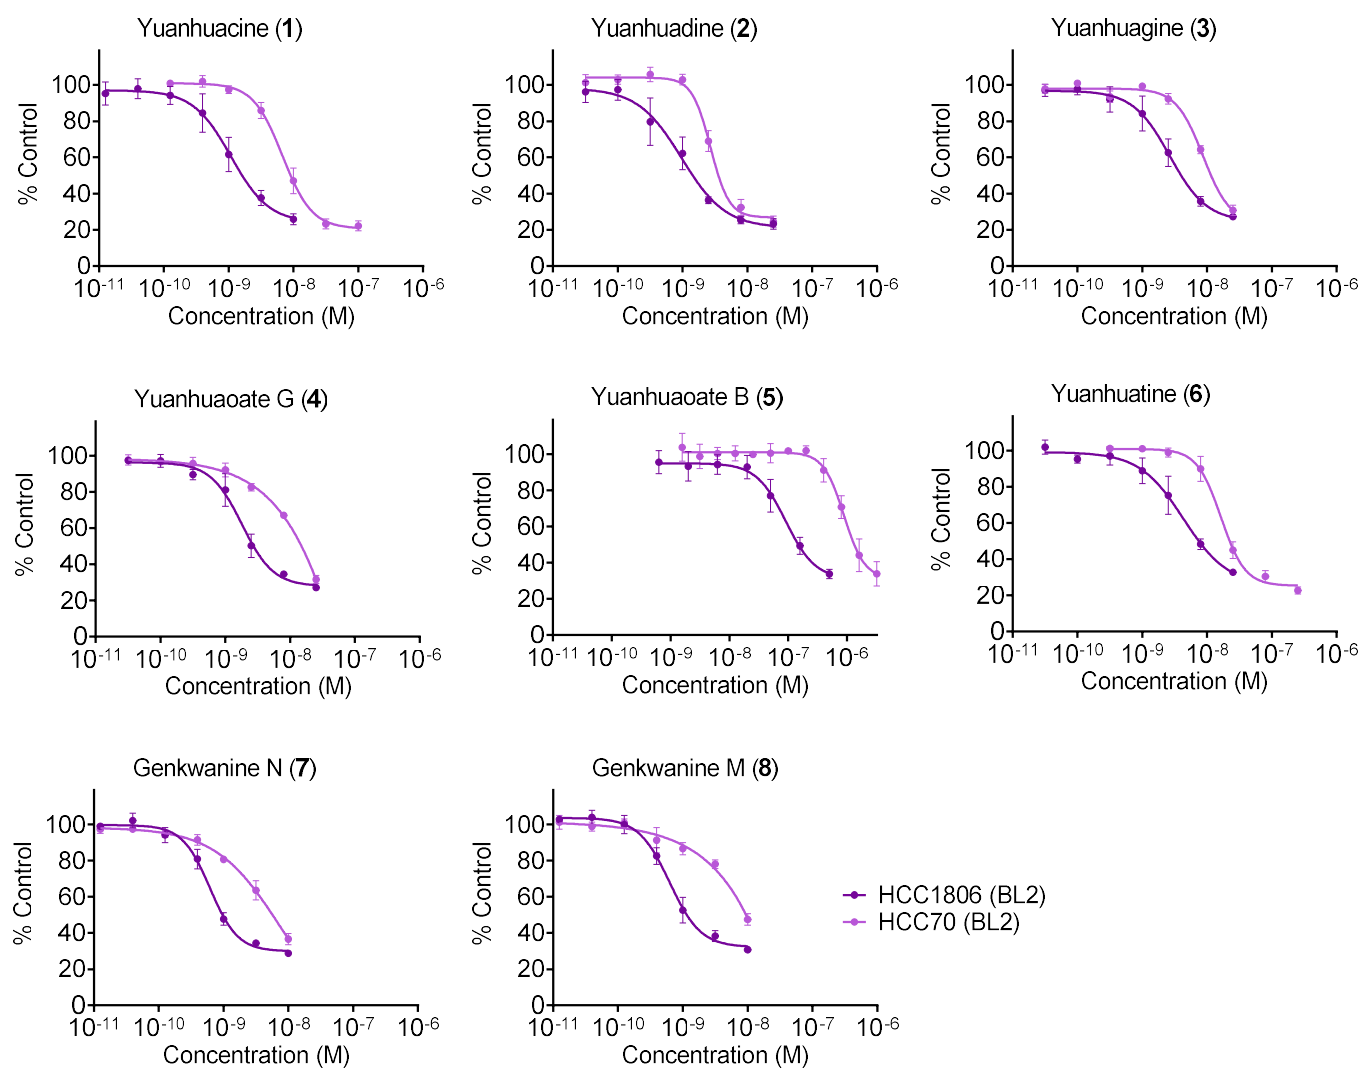

**Figure S2.** Concentration response curves for the growth of HCC1806 and HCC70 cells treated for 48 h with compounds 1-8.

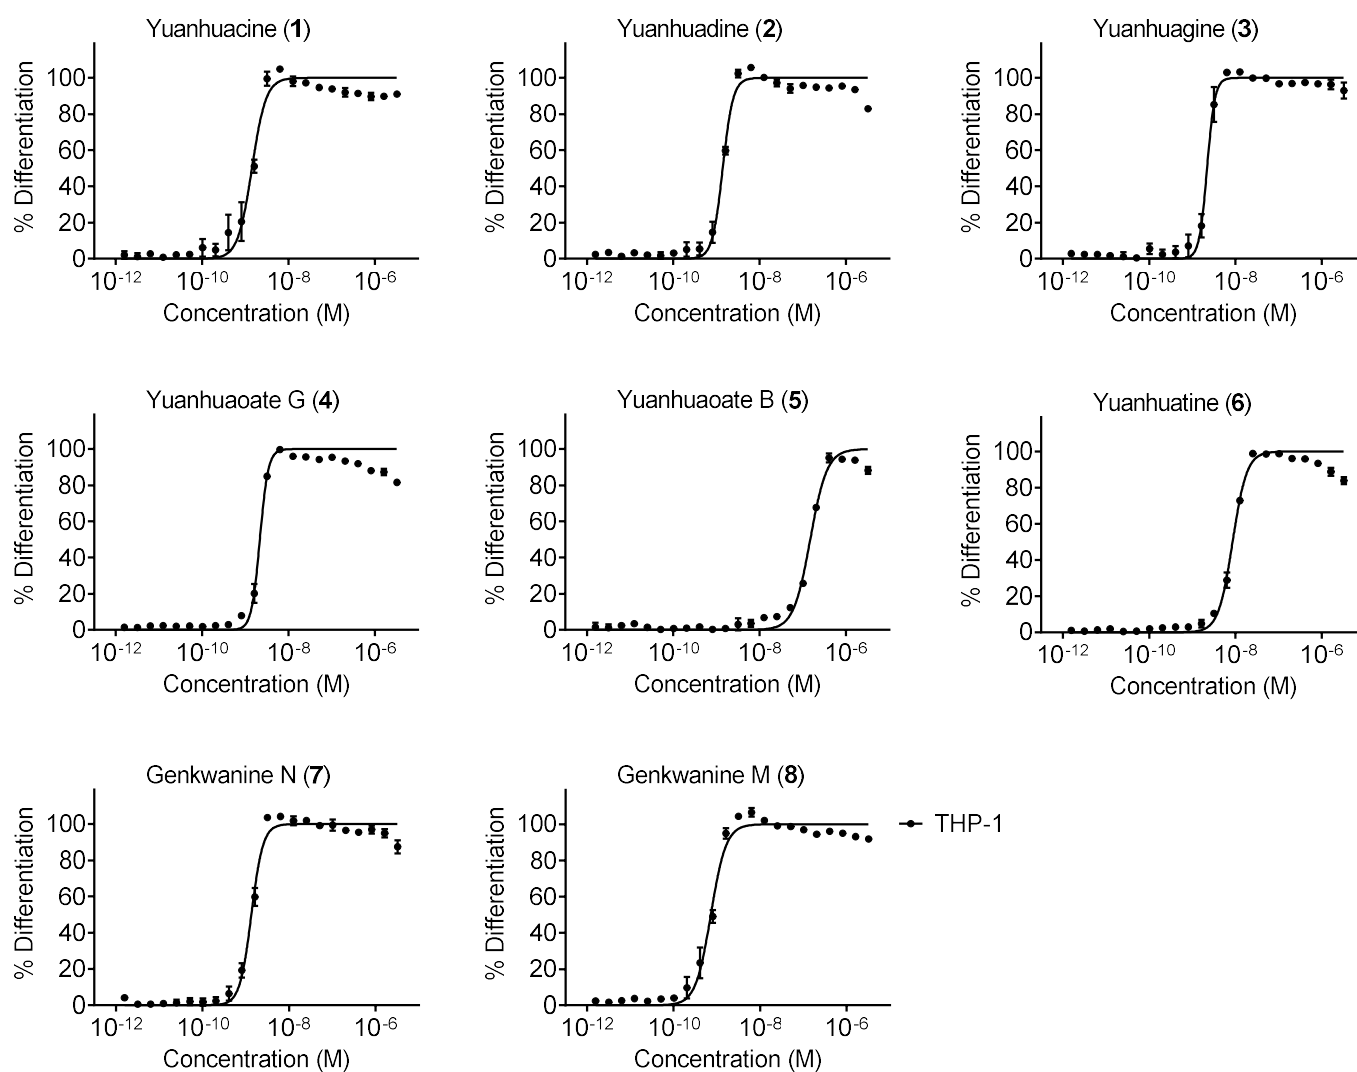

**Figure S3.** Concentration response curves for the differentiation of THP-1 cell treated for 24 h with compounds 1-8.

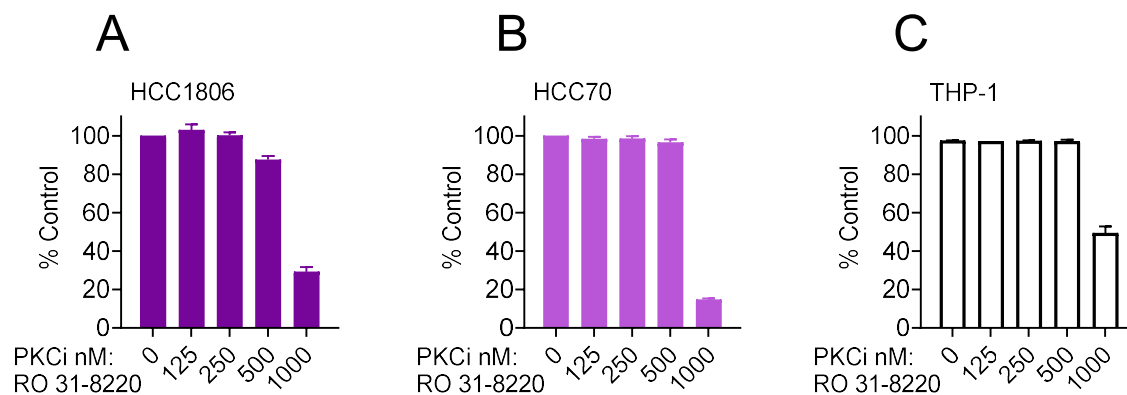

**Figure S4.** Growth of cells treated with the PKC inhibitor Ro 31-8220. Growth of (A) HCC1806 or (B) HCC70 cells when treated with the PKC inhibitor Ro 31-8220 (PKCi) for 48 h as determined by the SRB assay. (C) Caspase 3/7 cleavage in THP-1 cells treated with the PKC inhibitor Ro 31-8220 for 24 h.

**Table S1.** List of DNA oligonucleotides used in this study. All oligonucleotides were purchased from Sigma-Aldrich and validated by performing a Primer-Blast (<https://www.ncbi.nlm.nih.gov/tools/primer-blast/index.cgi>, accessed on 5 March 2021).

| Gene Name          | Forward and reverse oligonucleotide sequence (5' → 3') used in qRT-PCR analyses |
|--------------------|---------------------------------------------------------------------------------|
| Human GAPDH        | GCAAATTCATGGCACCGT                                                              |
|                    | TCGCCCCACTTGATTTTGG                                                             |
| Human IFN $\gamma$ | CTAATTATTCGGTAACTGACTTGA                                                        |
|                    | ACAGTTCAGCCATCACTTGGA                                                           |
| Human IL-12        | CATGGTGGATGCCGTTTACA                                                            |
|                    | ACCTCCACCTGCCGAGAATT                                                            |
| Human IL-10        | GCTGGAGGACTTTAAGGGTTACCT                                                        |
|                    | CTTGATGTCTGGGTCTTGGTTCTC                                                        |
| Mouse GAPDH        | TTCACCACCATGGAGAAGGC                                                            |
|                    | GGCATGGACTGTGGTCATGA                                                            |
| Mouse IL-12        | AGAAAGGTGCGTTCCTCGTAG                                                           |
|                    | AGCCAACCAAGCAGAAGACAG                                                           |
